# Supplementary material for: Prenatal Detection of Novel Compound Heterozygous Splice Site Variants of the KIAA0825 Gene in a Fetus with Postaxial Polydactyly Type A
Source: MDPI journal article supplement (doi:10.3390/genes13071230), 2022-07-11
Supplement: s1 [file s1]

## Online Supplementary Materials

### Supplementary methods

#### Minigene reporter assay:

To create hybrid minigene constructs, we used the pcMINI-C vector that we developed previously, which is based on the pcDNA 3.0 mammalian expression vector and contains a multicloning site as shown in Supplementary Figure S1. We cloned DNA fragments containing a couple of exons and introns around the target variant in the *KIAA0825* gene using classical restriction and ligation methods. Primer sequences for the c.-1-2 A>T variant and the c.2247-2 A>G variant were shown in Supplementary Table 1 and Table 2, respectively.

1. Detailed steps for minigene constructs carrying the c.-1-2 A>T variant were as follows:

(1) Two pairs of nested primers, 79980-KIAA-F with 82839-KIAA-R and 80831-KIAA-F with 82478-KIAA-R, were designed. Nested PCR was carried out with normal human gDNA as the template.

(2) WT fragment amplification: the second round of nested PCR was used as the template and pcMINI-C-KIAA-KpnI-F and pcMINI-C-KIAA-BamHI-R were used as primers to amplify the 1100bp wild-type fragment of pcMINI-C.

(3) Mutant fragment amplification: pcMINI-C-KIAA-KpnI-F with KIAA-MUT-R and KIAA-MUT-F with pcMINI-C-KIAA-BamHI-R were used as primers to amplify the upstream and downstream segments, respectively. The 1:1 mixture of upstream and downstream segments was used as the template, and pcMINI-C-KIAA-KpnI-F and pcMINI-C-KIAA-BamHI-R were used as primers to amplify the 1100bp of pcMINI-C c.-1-2 A>T mutant fragment.

2. Detailed steps for minigene constructs carrying the c.2247-2 A>G variant were as follows:

(1). Two pairs of nested primers, 163815-KIAA-F and 166878-KIAA-R and 164168-KIAA-F and 166456-KIAA-R, were designed. Nested PCR was carried out with normal human gDNA as template.

(2) WT fragment amplification: the second round of nested PCR was used as the template, and pcMINI-C-KIAA-c.2247-EcoRI-F and pcMINI-C-KIAA-c.2247-NotI-R were used as primers to amplify the 1100bp wild-type fragment of pcMINI-C.

(3). Mutant fragment amplification: PcMINI-C-KIAA-c.2247-EcoRI-F with KIAA-MUT-R and KIAA-MUT-F with pcMINI-C-KIAA-c.2247-NotI-R were used as primers to amplify the upstream and downstream segments, respectively. The 1:1 mixture of upstream and downstream segments was used as the template, and pcMINI-C-KIAA-c.2247-EcoRI-F and pcMINI-C-KIAA-c.2247-NotI-R were used as primers to amplify the 1035bp of pcMINI-C c.2247-2 A>G mutant fragment.

3. The hybrid minigenes were confirmed by sequencing and transfected into HEK293T and HeLa cells using Lipofectamine® 2000 (Thermo Fisher Scientific, Waltham, MA, CA). After 48 hours, total RNA was extracted using the RNA extraction kit (Trizol RNAiso PLUS, 9109, TaKaRa), retro-transcribed with the Superscript III reverse transcriptase (Hifair™ 1st Strand cDNA Synthesis SuperMix for qPCR(gDNA digester plus), 11123ES70, YEASEN ) and the resulting cDNA was PCR-amplified. The amplified products were analyzed on 1.5% agarose gel electrophoresis and subsequently sequenced by Sanger sequencing.

## Supplemental Figures

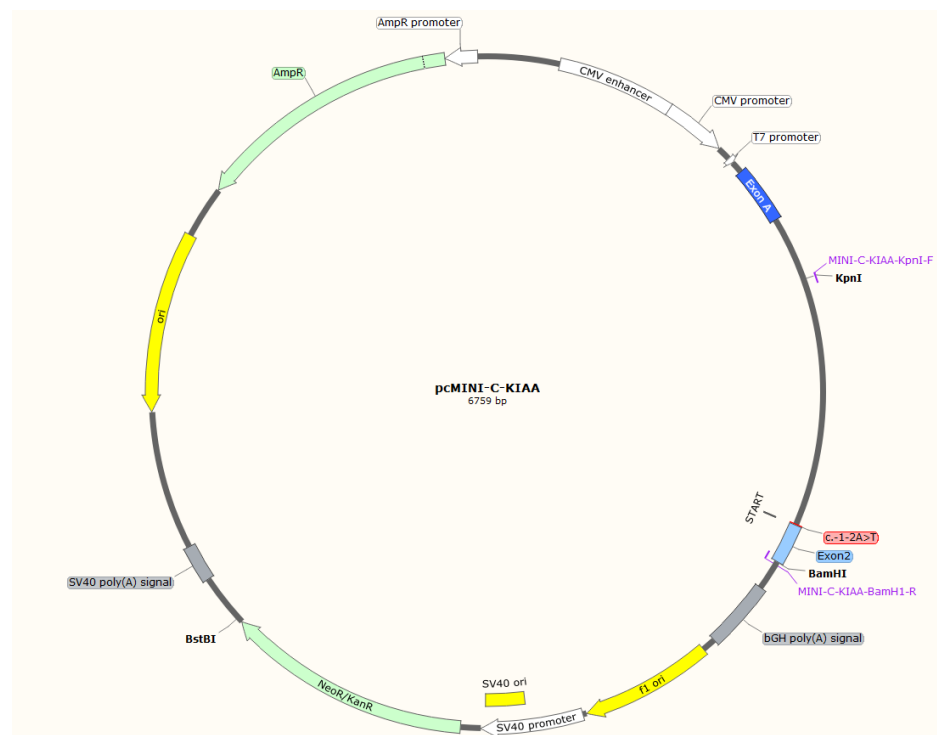

(a) The pcMINI-C vector construction map for the minigene assay of c.-1-2 A>T variant.

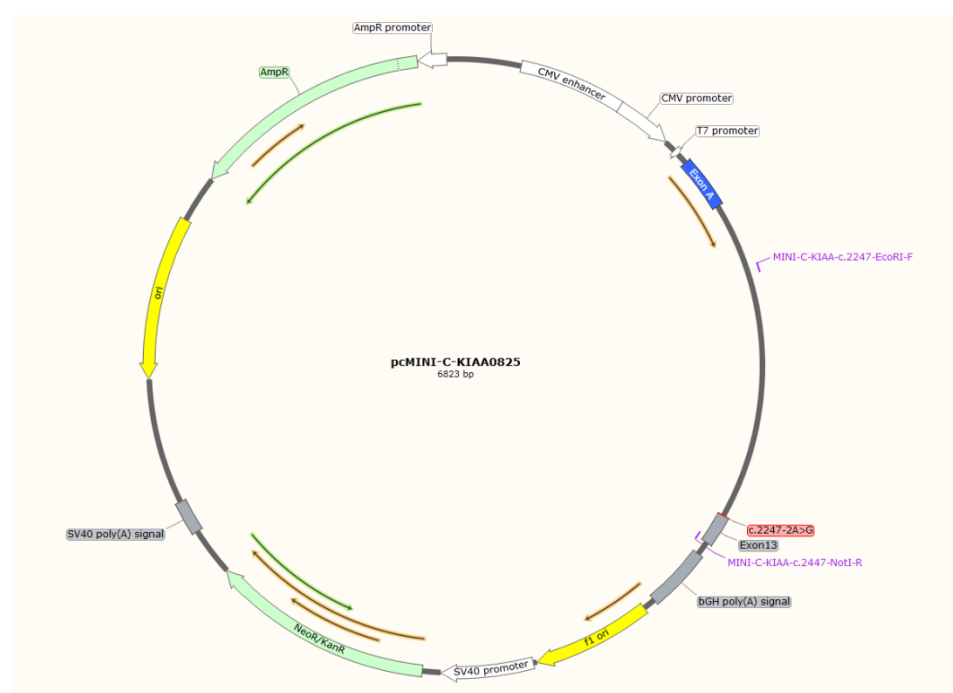

(b) The pcMINI-C vector construction map for the minigene assay of c.2247-2 A>G variant.

**Figure S1.** The pcMINI-C vector construction map for the minigene assay.

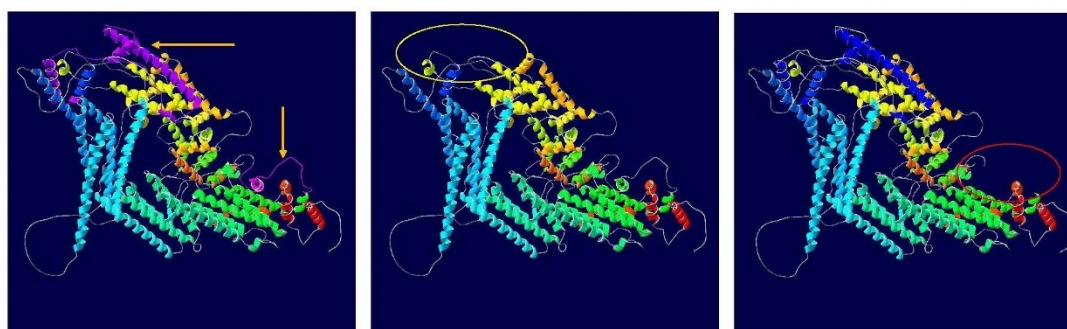

(a) Wild type

(b) p.Asn1\_Glu112del

(c) p.Phe751\_Thr787del

**Figure S2.** The pcMINI-C vector construction map for the minigene assay.

AF-Q8IV33-F1-model\_v2 was computed using the AlphaFold Protein Structure Database. Protein structures of wild and mutant types were produced by SwissPdb Viewer.

## References

- [1] Guex, N. and Peitsch, M.C. (1997). SWISS-MODEL and the Swiss-PdbViewer: An environment for comparative protein modeling.
- [2] Electrophoresis 18, 2714-2723. Jumper, J et al. Highly accurate protein structure prediction with AlphaFold. Nature (2021).
- [3] Varadi, M et al. AlphaFold Protein Structure Database: massively expanding the structural coverage of protein-sequence space with high-accuracy models. Nucleic Acids Research (2021).

## Supplementary Tables

Table S1: The number of variants after each filtering step.

| Filtering step                                                    | Variant number            |
|-------------------------------------------------------------------|---------------------------|
|                                                                   | Fetus                     |
| Initial                                                           | 114,573                   |
| 1. Exclude the variants outside exonic and splicing regions       | 36,549                    |
| 2. Exclude the variants with MAF* > 0.01                          | 3,049                     |
| 3. Exclude the synonymous variants in exome                       | 1,936                     |
| 4. Include the variants inherited in de novo, AR and XR patterns# | 315 variants in 105 genes |

\*MAF: Minor allele frequency in gnomAD, 1000 genome and Exome Aggregation Consortium database

# AR, autosomal recessive; XR, X-linked recessive.

Table S2: Primer sequences in the minigene constructs carrying the c.-1-2 A&gt;T variant.

| Primer name           | Primer sequence (5'-3')         |
|-----------------------|---------------------------------|
| 79980-KIAA-F          | aatggtagtggcagaaaggc            |
| 80831-KIAA-F          | ctcacactctgtccttgctc            |
| 82478-KIAA-R          | gagaggatttctgggatggg            |
| 82839-KIAA-R          | gttgctgttgcaatttgca             |
| pcMINI-C-KIAA-KpnI-F  | ggtaggtaccaggggtgctagagaaactca  |
| PcMINI-C-KIAA-BamHI-R | tagtggatcccttcagcattttgttcaat   |
| KIAA-MUT-F            | ttattcttgctcctctgaatggattgggatg |
| KIAA-MUT-R            | catcccaatccattcagaggagcaagaataa |

Table S3: Primer sequences in the minigene constructs carrying the c.2247-2 A&gt;G variant.

| Primer name                  | Primer sequence (5'-3')         |
|------------------------------|---------------------------------|
| 163815-KIAA-F                | aacctgctctcctactact             |
| 164168-KIAA-F                | ggggagagaagggtcagatt            |
| 166456-KIAA-R                | ggtccttgaagatggggtct            |
| 166878-KIAA-R                | ggttgatccgagcaagcttg            |
| KIAA-MUT-F                   | tatttgattttccctgggacttttcagcatg |
| KIAA-MUT-R                   | catgctgaaaagtcccagggaatacaata   |
| pcMINI-C-KIAA-c.2247-EcoRI-F | ggtggaattcgccctcttagatccttagg   |
| pcMINI-C-KIAA-c.2247-NotI-R  | tcgagcggccgcgctgagtaagaaggtagaa |
